# Supplementary material for: J- vs. H-type assembly: pentamethine cyanine (Cy5) as a near-IR chiroptical reporter
Source: Royal Society of Chemistry journal article supplement (doi:10.1039/c3cc42103a), 2013-01-01
Supplement: c3cc42103a.pdf [file c3cc42103a.pdf]

*Supporting Information:*

**J- vs. H-type assembly: pentamethine cyanine (Cy5) as near IR chiroptical reporter**

**Larysa I. Markova,<sup>a,b</sup> Vladimir L. Malinovskii,<sup>a</sup> Leonid D. Patsenker<sup>b</sup> and Robert Häner\*<sup>a</sup>**

<sup>a</sup> *Department of Chemistry and Biochemistry, University of Bern, Freiestrasse 3, CH-3012 Bern, Switzerland*

<sup>b</sup> *Department of Organic Luminophores and Dyes, State Scientific Institution "Institute for Single Crystals" of the NAS of Ukraine, 60, Lenin Ave., Kharkiv 61001, Ukraine.*

**TABLE OF CONTENTS**

|                                                                                                                                                      |     |
|------------------------------------------------------------------------------------------------------------------------------------------------------|-----|
| 1. General                                                                                                                                           | S2  |
| 2. Experimental procedures                                                                                                                           | S2  |
| 3. Mass-spectrometry and HPLC data of the cyanine (Cy5) modified <b>ON1</b> and <b>ON2</b> and squaraine ( <b>Sq</b> ) modified <b>ON5</b>           | S3  |
| 4. Excitation spectra                                                                                                                                | S6  |
| 5. Influence of the temperature on the absorption and emission spectra of <b>Cy5</b> containing oligonucleotide <b>ON2</b> and duplex <b>ON1*ON2</b> | S7  |
| 6. T <sub>m</sub> experiments                                                                                                                        | S8  |
| 7. Quantitative analysis of asymmetry of exciton couplet                                                                                             | S9  |
| 7.1 Fitting of absorbance and CD bands shape.                                                                                                        | S9  |
| 7.2 Integration of signal intensity and ratio of g-factors                                                                                           | S10 |
| 8. Titration experiment                                                                                                                              | S12 |
| 9. CD spectra of the oligonucleotides <b>ON2</b> and <b>ON5</b> and hybrids <b>ON3*ON5</b> and <b>ON3*ON4</b>                                        | S13 |

## 1. General

Absorption spectra were recorded in 1-cm quartz cells at 20 °C on *Varian Cary-100 Bio-UV/VIS* spectrophotometer equipped with a *Varian Cary-block* temperature controller.

Emission spectra and quantum yields ( $\Phi_F$ ) were measured in 1-cm quartz cells at 20 °C on *Varian Cary Eclipse* fluorescence spectrophotometer equipped with a *Varian Cary-block* temperature controller.

CD spectra were recorded on a *JASCO J-715* spectropolarimeter using quartz cuvettes with an optical path of 1 cm.

HPLC purity determination was performed with a *Shimadzu LC* system equipped with a *Shimadzu-block* temperature controller.

Oligonucleotides **ON1** and **ON2** containing **Cy5** molecule in the backbone were from Microsynth (Balgach, Switzerland) and BaseClick (Tutzing, Germany). Not modified oligonucleotides **ON3** and **ON4** were from Microsynth (Balgach, Switzerland). Oligonucleotide **ON5** containing squaraine (**Sq**) molecule in the backbone was synthesized according to [1].

## 2. Experimental procedures

The purity of the oligonucleotides was determined by reverse phase HPLC: column LiChrospher<sup>®</sup> 100 RP-18, 250 mm × 4 mm, Merck; mobile phase A = (Et<sub>3</sub>NH)OAc (0.1 M, pH 7.4); mobile phase B = MeCN; elution at 20 °C; gradient 0 – 40% B over 22 min, then 40-100% B over 5 min.

Measurements of spectra in aqueous solutions (except quantum yields determination) were performed at a concentration of 1.5 μM (10 mM PB, pH = 7.4, 100 mM NaCl) for oligonucleotides and at a concentration of 1.5 μM + 1.5 μM of each strand (10 mM PB, pH = 7.4, 100 mM NaCl) for duplexes. Concentration of oligonucleotides was determined using molar absorptivities of  $\epsilon_{260}(\mathbf{ON1}) = 227\,400\text{ M}^{-1}\text{ cm}^{-1}$ ,  $\epsilon_{260}(\mathbf{ON2}) = 206\,200\text{ M}^{-1}\text{ cm}^{-1}$ ,  $\epsilon_{260}(\mathbf{ON3}) = 231\,400\text{ M}^{-1}\text{ cm}^{-1}$ ,  $\epsilon_{260}(\mathbf{ON4}) = 216\,500\text{ M}^{-1}\text{ cm}^{-1}$  and  $\epsilon_{260}(\mathbf{ON5}) = 212\,200\text{ M}^{-1}\text{ cm}^{-1}$ ; a value of  $\epsilon_{260}(\mathbf{Cy5}) = 5\,000\text{ M}^{-1}\text{ cm}^{-1}$  was applied for calculation of  $\epsilon_{260}(\mathbf{ON1})$  and  $\epsilon_{260}(\mathbf{ON2})$  and a value of  $\epsilon_{260}(\mathbf{Sq}) = 11\,000\text{ M}^{-1}\text{ cm}^{-1}$  was applied for calculation of  $\epsilon_{260}(\mathbf{ON5})$ .

Thermal denaturation experiments were carried out on a *Varian Cary-100 Bio-UV/VIS* spectrophotometer and data were collected at 260, 590 and 645 nm for duplex **ON1\*ON2** with internal **Cy5** modifications in the backbone and at 260 nm for non-modified duplex **ON3\*ON4** (cooling-heating cycles in the temperature range of 20-90 °C, temperature gradient of 0.5 °C/min). Melting temperature ( $T_m$ ) values were determined as the maximum of the first derivative of the melting curve.

For the determination of the quantum yields, the integrated relative intensities of the samples were measured against **Cy5** (quantum yield,  $QY_{\text{Cy5}} = 27\%$  in water [2]) as the reference. Absorbance of the solutions at the excitation wavelength (600 nm for the **ON1**, **ON2** and **ON5**, and 625 nm for the

---

1 L.I. Markova, V.L. Malinovskii, L.D. Patsenker, R.Häner, Synthesis and properties of squaraine-modified DNA. *Org. Biomol. Chem.* 2012, **10**, 8944-8947.

2 R.B. Mujumdar, L.A. Ernst, S.R. Mujumdar, C.J. Lewis, A.S. Waggoner, Cyanine dye labeling reagents: sulfoindocyanine succinimidyl esters. *Bioconjug. Chem.* 1993, **4**, 105–111.

duplexes **ON1\*ON2** and **ON1\*ON5**) was between 0.04–0.06 measured in a 1-cm cell. The emission spectra of the solutions were recorded and the quantum yields of the samples were determined as described in [3] according to formula:

$$QY = QY_{Cy5} \times (F/F_{Cy5}) \times (A_{Cy5}/A) \times (n^2/n_{Cy5}^2),$$

where  $F$  and  $F_{Cy5}$  are the integrated areas of the fluorescence spectra,  $A$  and  $A_{Cy5}$  are the absorbance at the excitation wavelength and  $n$  and  $n_{Cy5}$  are the refraction indices of solvents used for the sample under examination and **Cy5**, respectively.

### 3. Mass-spectrometry and HPLC data of the cyanine (**Cy5**) modified **ON1** and **ON2** and squaraine (**Sq**) modified **ON5**

**Table S1.** Mass spectrometry data of the **ON1**, **ON2** (Qualitative analysis report) and **ON5** (ESI-MS, negative mode, MeCN/H<sub>2</sub>O/0.5%, Et<sub>3</sub>N)

| Oligomer   | Sequence                   | Molecular formula                                                                               | Mol Weight | Found mass |
|------------|----------------------------|-------------------------------------------------------------------------------------------------|------------|------------|
| <b>ON1</b> | 5' AGCTCGGTCACy5CGAGAGTGCA | C <sub>226</sub> H <sub>282</sub> N <sub>83</sub> O <sub>120</sub> P <sub>20</sub> <sup>-</sup> | 6700.62    | 6700.24    |
| <b>ON2</b> | 3' TCGAGCCAGTCy5GCTCTCACGT | C <sub>224</sub> H <sub>284</sub> N <sub>73</sub> O <sub>124</sub> P <sub>20</sub> <sup>-</sup> | 6602.54    | 6602.17    |
| <b>ON5</b> | 3' TCGAGCCAGTSqGCTCTCACGT  | C <sub>231</sub> H <sub>293</sub> N <sub>73</sub> O <sub>126</sub> P <sub>20</sub>              | 6724.35    | 6724.34    |

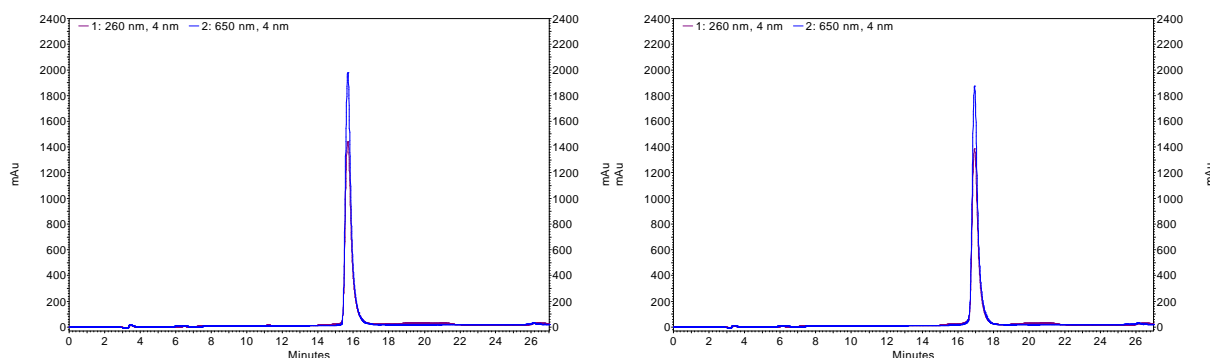

**Figure S1.** HPLC data of the oligonucleotides **ON1** (left) and **ON2** (right) recorded at 260 and 650 nm.

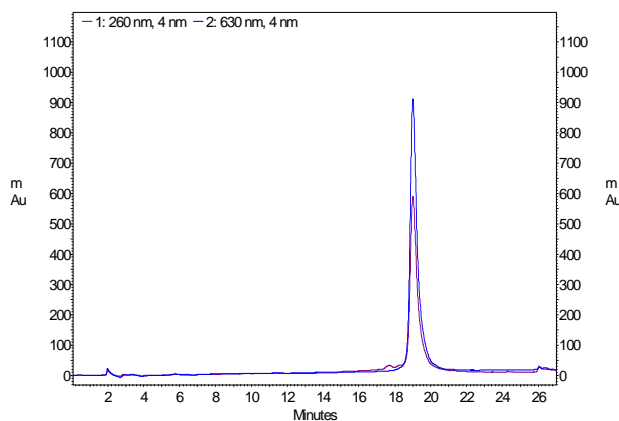

**Figure S2.** HPLC data of the oligonucleotide **ON5** recorded at 260 and 630 nm.

## Qualitative Analysis Report – ESI-TOF

|               |                     |               |                        |
|---------------|---------------------|---------------|------------------------|
| Data Filename | 20524A15D01 1-2d    | Position      | P1-D4                  |
| Acq Method    | ESI_Standard_0.m    | Acquired Time | 06/01/2012 12:43:50 PM |
| DA Method     | baseclick_4-15kDa.m | Comment       | HPLC                   |

### Sample Group

#### Info

|                |                                    |
|----------------|------------------------------------|
| Contact Person | Larysa Markova                     |
| Order ID       | 120509-195                         |
| Sequence       | 5'-AGC TCG GTC A6C GAG AGT GCA -3' |
| # Bases        | 20                                 |
| Expected MW    | 6701                               |

### Deconvoluted Spectra

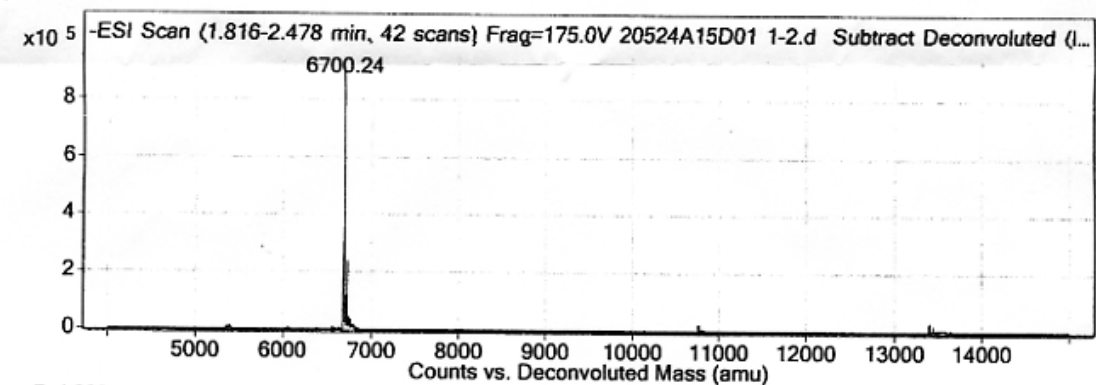

## Qualitative Analysis Report – ESI-TOF

|                      |                     |                      |                       |
|----------------------|---------------------|----------------------|-----------------------|
| <b>Data Filename</b> | 20522A853E02 2-2d   | <b>Position</b>      | P1-D6                 |
| <b>Acq Method</b>    | ESI_Standard_1.m    | <b>Acquired Time</b> | 06/01/2012 1:25:01 PM |
| <b>DA Method</b>     | baseclick_4-15kDa.m | <b>Comment</b>       | HPLC                  |

### Sample Group

#### Info

|                       |                                   |
|-----------------------|-----------------------------------|
| <b>Contact Person</b> | Larysa Markova                    |
| <b>Order ID</b>       | 120509-195                        |
| <b>Sequence</b>       | 5'-TGC ACT CTC G6T GAC CGA GCT-3' |
| <b># Bases</b>        | 20                                |
| <b>Expected MW</b>    | 6603                              |

### Deconvoluted Spectra

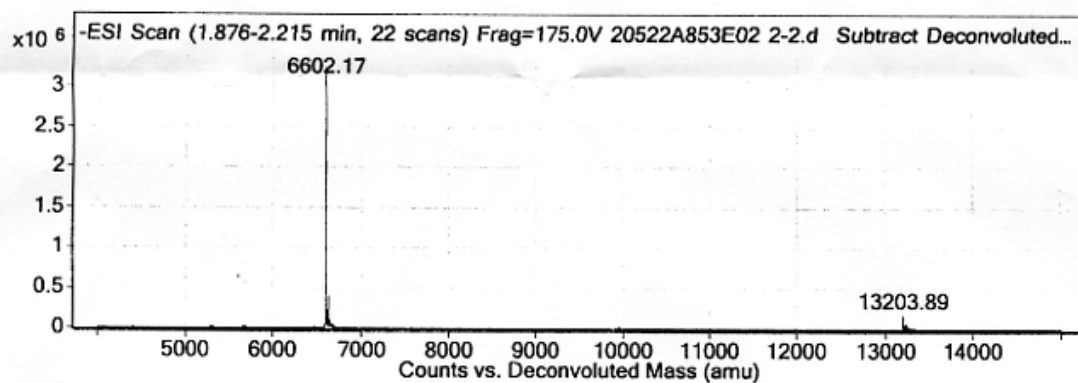

--- End Of Report ---

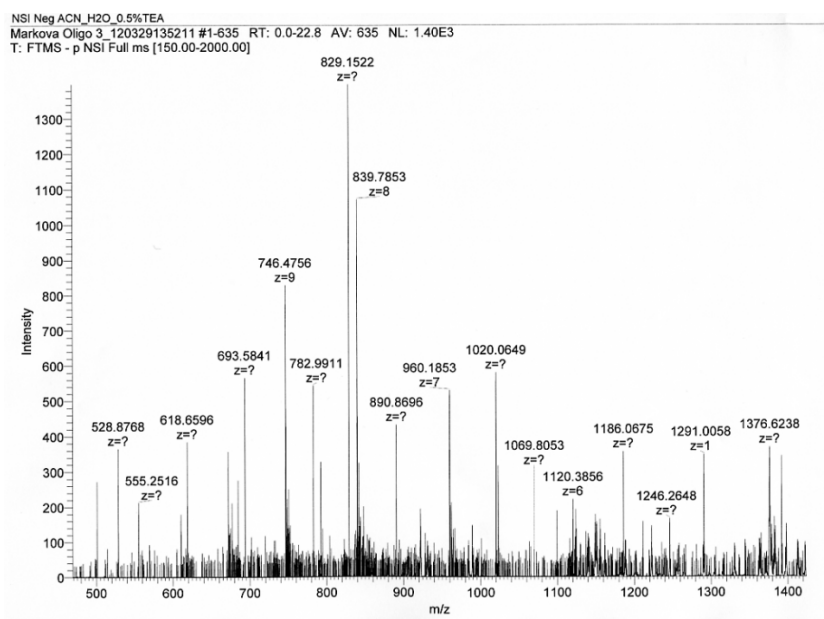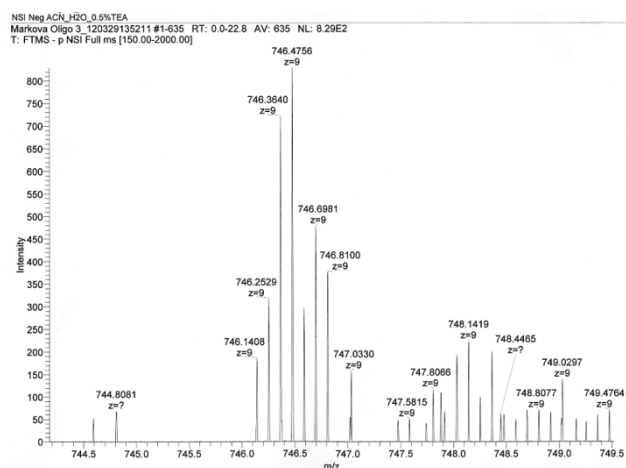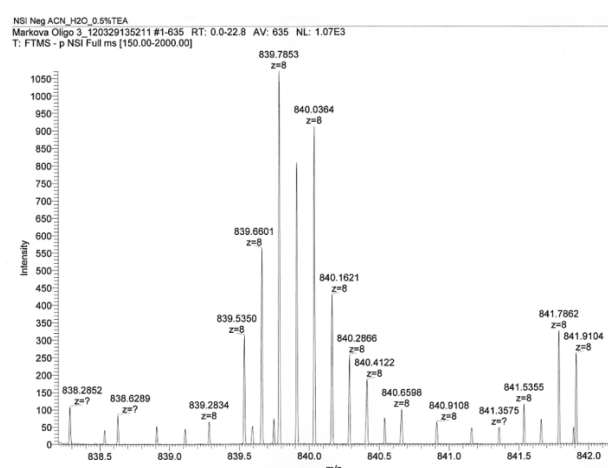

Figure S3. HR-MS of the ON5.

#### 4. Excitation spectra

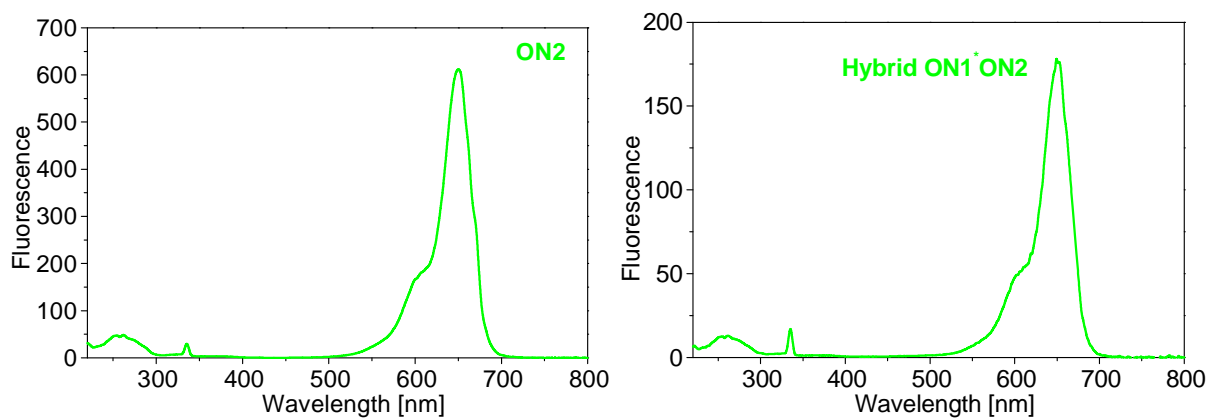

Figure S4. Excitation spectra of the oligonucleotide ON2 (left) and duplex ON1\*ON2 (right).  $\lambda_{em} = 670$  nm.

## 5. Influence of the temperature on the absorption and emission spectra of Cy5 containing oligonucleotide ON2 and duplex ON1\*ON2

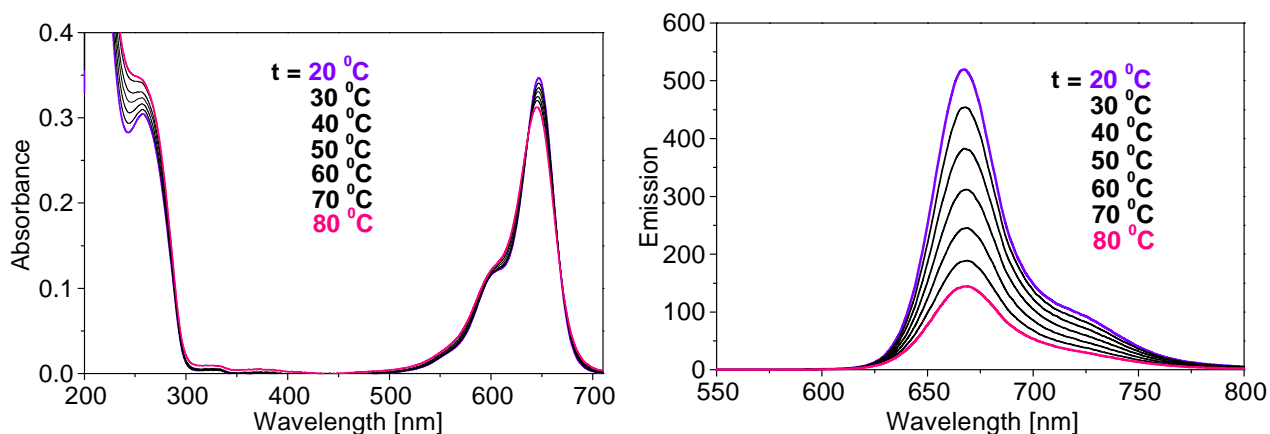

**Figure S5.** Influence of the temperature on the absorption and emission spectrum of the **Cy5** containing oligonucleotide **ON2** in the temperature range 20-80 °C.

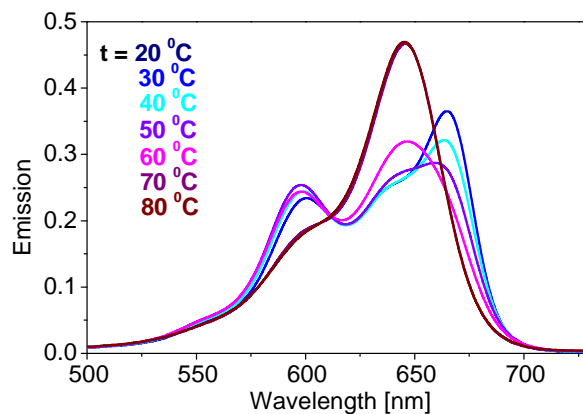

**Figure S6.** Influence of the temperature on the absorption spectrum of the **Cy5** containing duplex **ON1\*ON2** in the temperature range 20-80 °C.

## 6. T<sub>m</sub> experiments

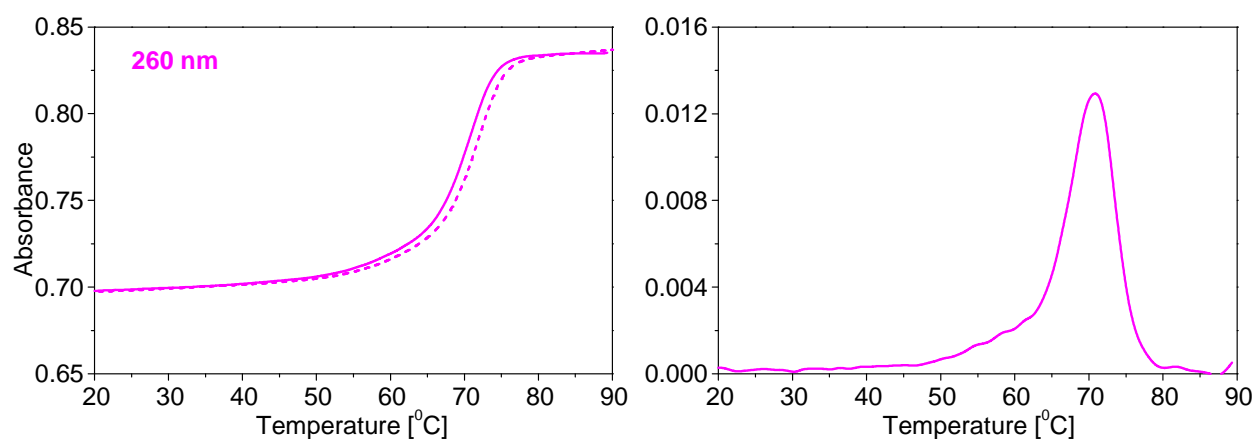

**Figure S7.** Example of T<sub>m</sub> determination procedure: duplex **ON3\*ON4**, melting curves at 260 nm (left) and first derivative curve (right), T<sub>m</sub> = 70.7 °C (right).

**Table S2.** Hybridization data of the cyanine containing duplex **ON1\*ON2** and its non-modified analog **ON3\*ON4**. (Cy5-Cy5 vs A-T base pair)\*.

| Oligomer   | Duplex                     | T <sub>m</sub> , °C | ΔT <sub>m</sub> , °C |
|------------|----------------------------|---------------------|----------------------|
| <b>ON3</b> | 5' AGCTCGGTCATCGAGAGTGCA   | 70.7                | –                    |
| <b>ON4</b> | 3' TCGAGCCAGTAGCTCTCACGT   |                     |                      |
| <b>ON1</b> | 5' AGCTCGGTCACy5CGAGAGTGCA | 66.7                | - 4.0                |
| <b>ON2</b> | 3' TCGAGCCAGTCy5GCTCTCACGT |                     |                      |

\* from the first derivative of the cooling (90 °C – 20 °C) curve



## 7. Quantitative analysis of asymmetry of exciton couplet:

### 7.1 Fitting of absorbance and CD bands shape.

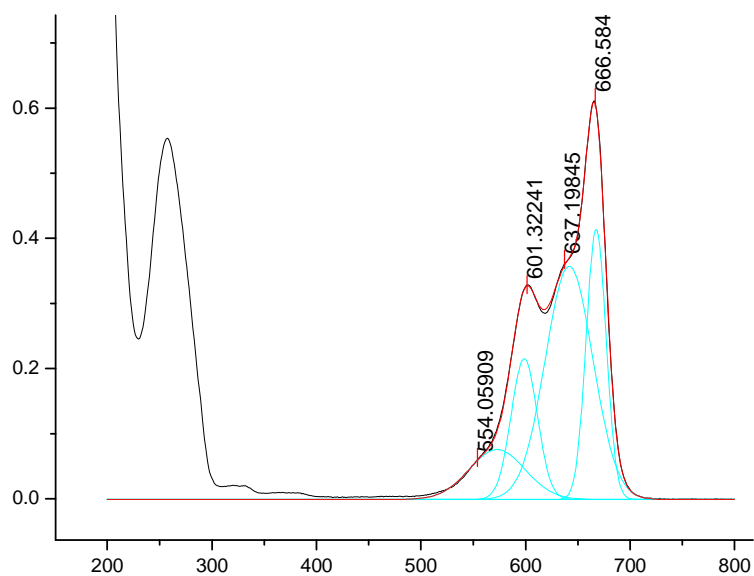

**Figure S8.** Fitting of absorbance band shape of Cy-Cy containing hybrid.

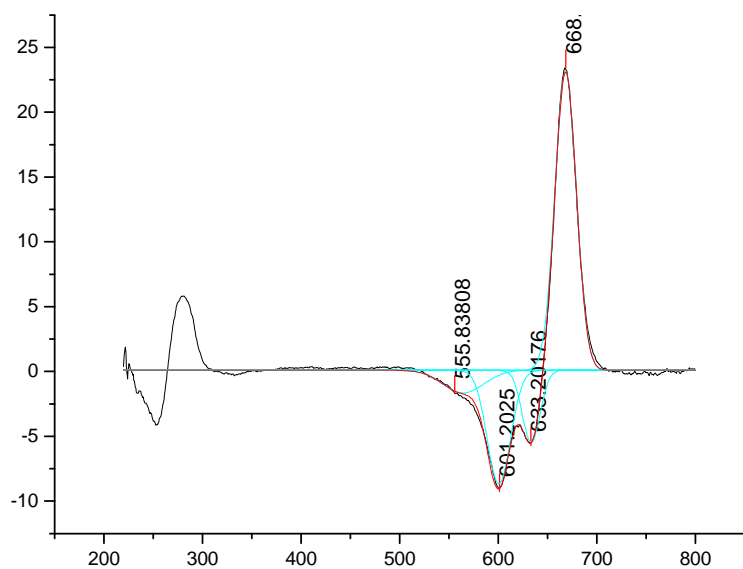

## Peak Analysis

Data Set:[DUPL20CCOR]Sheet1!B

Date:17.03.2013

Chi<sup>2</sup>=1.57595E+000

Adj. R-Square=9.31557E-001

# of Data Points=1161

SS=1.81076E+003

Degree of Freedom=1149.

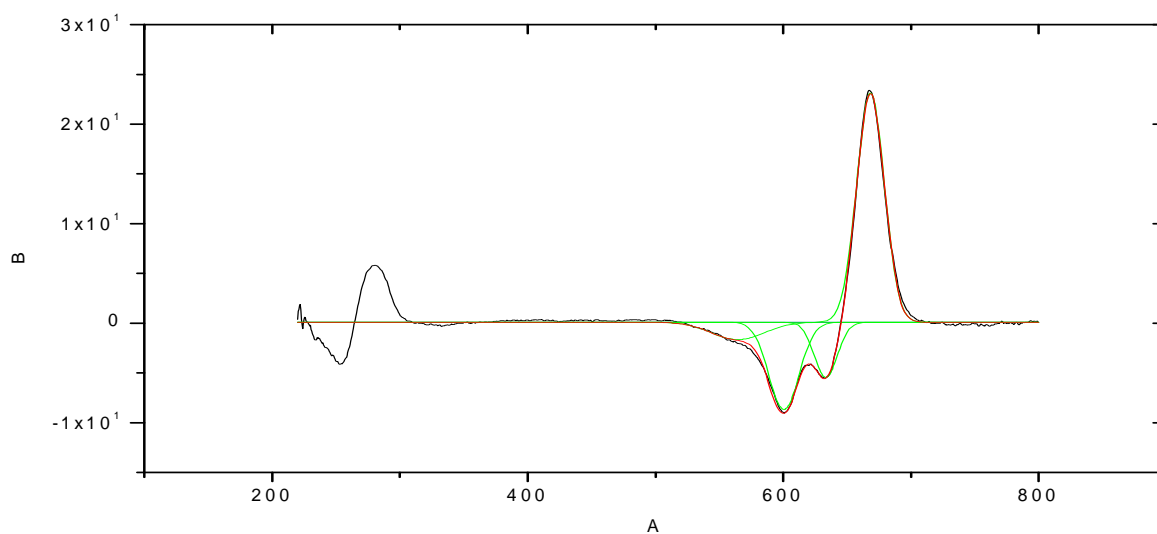

### Fitting Results

| Peak Index | Peak Type | Area Intg  | FWHM     | Max Height | Center Grvty | Area IntgP |
|------------|-----------|------------|----------|------------|--------------|------------|
| 1.         | Gaussian  | -90.69806  | 48.77989 | -1.74673   | 564.54777    | -8.60082   |
| 2.         | Gaussian  | -259.87933 | 27.87716 | -8.75772   | 600.55963    | -24.64415  |
| 3.         | Gaussian  | -125.87017 | 21.3651  | -5.53459   | 633.34685    | -11.93617  |
| 4.         | Gaussian  | 622.59554  | 25.40534 | 23.02231   | 668.2994     | 59.04023   |

Figure S9. Fitting of CD shape of Cy-Cy containing hybrid.

## 7.2 Integration of CD signals.

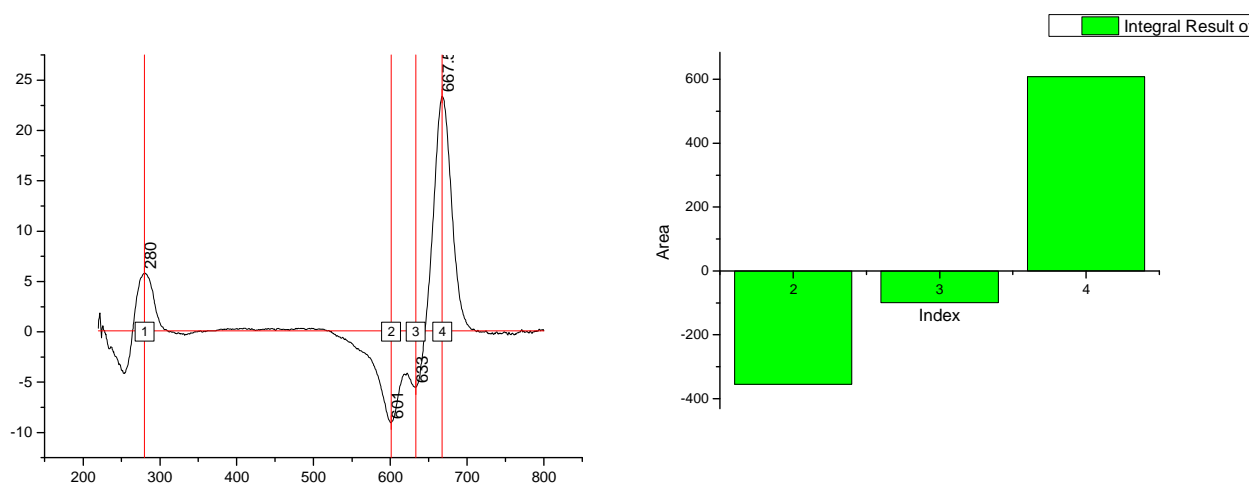

| Integral Result of B |
|----------------------|----------------------|----------------------|----------------------|----------------------|----------------------|----------------------|----------------------|----------------------|
| Index                | Area                 | AreaIntgP (%)        | Row Index            | Beginning X          | Ending X             | FWHM                 | Center               | Height               |
| 1                    | 45.8718              | 3.42315              | 120                  | 228                  | 309.5                | 23.70212             | 280                  | 5.7309               |
| 2                    | -354.14384           | -26.42773            | 762                  | 521                  | 622                  | 31.77151             | 601                  | -9.12614             |
| 3                    | -99.23928            | -7.40566             | 826                  | 622                  | 645                  | 19.21005             | 633                  | -5.62839             |
| 4                    | 607.59975            | 45.3417              | 895                  | 645                  | 710.5                | 24.58379             | 667.5                | 23.32792             |

## Ratio of g-factors

Circular dichroism is defined as difference in absorbance of left and right circularly polarized light beams,  $CD = A^L - A^R$

g-factor, is defined as [4]:

$$g = \frac{\Delta\varepsilon}{\varepsilon} = \frac{A^L - A^R}{A}$$

$$g = \frac{CD}{A}$$

Where  $A^L$  and  $A^R$  are the absorptions of left and right circularly polarized light; and  $A$  represents the absorbance of nonpolarized light.

Output of CD instrument is usually presenting in ellipticity in mdeg,  $\Theta$  (mdeg):

$$\Theta \text{ (mdeg)} = \sim 33000 \text{ CD} = \sim 33000(A^L - A^R)$$

Therefore value of CD, or  $(A^L - A^R)$  can be obtained from experimental data as  $\Theta \text{ (mdeg)} / 33000$

Importantly, g-value calculation as  $g = (A^L - A^R) / A$  does not required concentration or extinction coefficient ( $\varepsilon$ ), when CD and absorbance are measured for the same sample. This is very valuable, because concentration and/or exact  $\varepsilon$  are often barely defined, especially for aggregated materials, polymers, etc.

g-factor is also called as *anisotropy or dissymmetry factor*, and was applied in our work to characterize an asymmetry of exciton couplet.

Experimental data for **ON1-ON2** hybrid at 20 °C:

$$A(668) = 0.59678 \quad ; \quad A(633) = 0.34578 \quad A(601) = 0.32854$$

$$CD(668) = 23.3657 \quad ; \quad CD(633) = -5.53441 \quad ; \quad CD(601) = -9.03216$$

$$g(668) = 7.01 \times 10^{-4} \quad ; \quad g(633) = -1.68 \times 10^{-4} \quad ; \quad g(601) = -2.74 \times 10^{-4}$$

that gives  $g_{(668\text{nm})}/g_{(633\text{nm})} = \underline{4.17}$  and  $g_{(668\text{nm})}/g_{(601\text{nm})} = \underline{2.56}$

## 8. Titration experiment.

Titration of the oligonucleotide **ON1** (starting conc. 1.5  $\mu\text{M}$ , 10 mM phosphate, pH = 7.4, 100 mM NaCl, 20  $^{\circ}\text{C}$ , V = 1000  $\mu\text{L}$ ) by addition of stock solution of oligonucleotide **ON2** ( $C_{\text{stock sol.}} = 7.5 \times 10^{-5}$  M) in 40  $\mu\text{L}$  steps. At first step, 20  $\mu\text{L}$  of **ON2** stock solution was used.

First step corresponds to the  $7.4 \times 10^{-8}$  M of duplex formed, assuming a total shift of equilibrium to the hybrid at 20  $^{\circ}\text{C}$ . Linear response of CD signal intensity on **ON2** concentration reveals a fast kinetic of hybridization and correlates with formation of one chiral product upon **Cy-Cy** assembly within hybrid **ON1-ON2**.

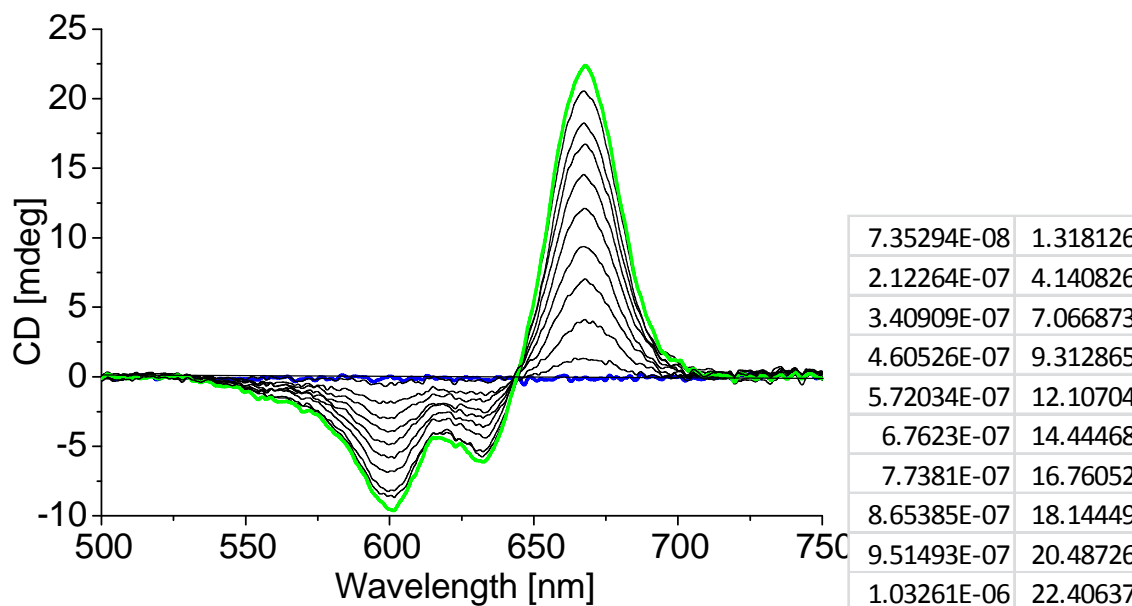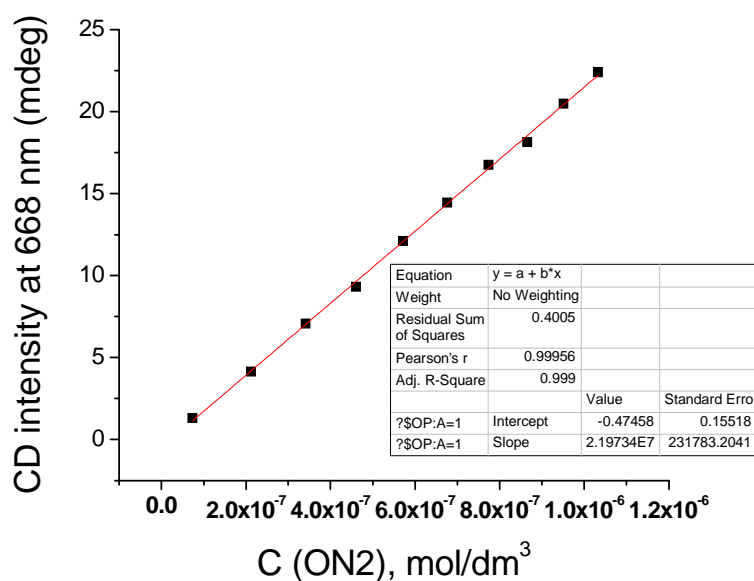

## 9. CD spectra of the oligonucleotides ON2 and ON5 and hybrids ON3\*ON5 and ON3\*ON4

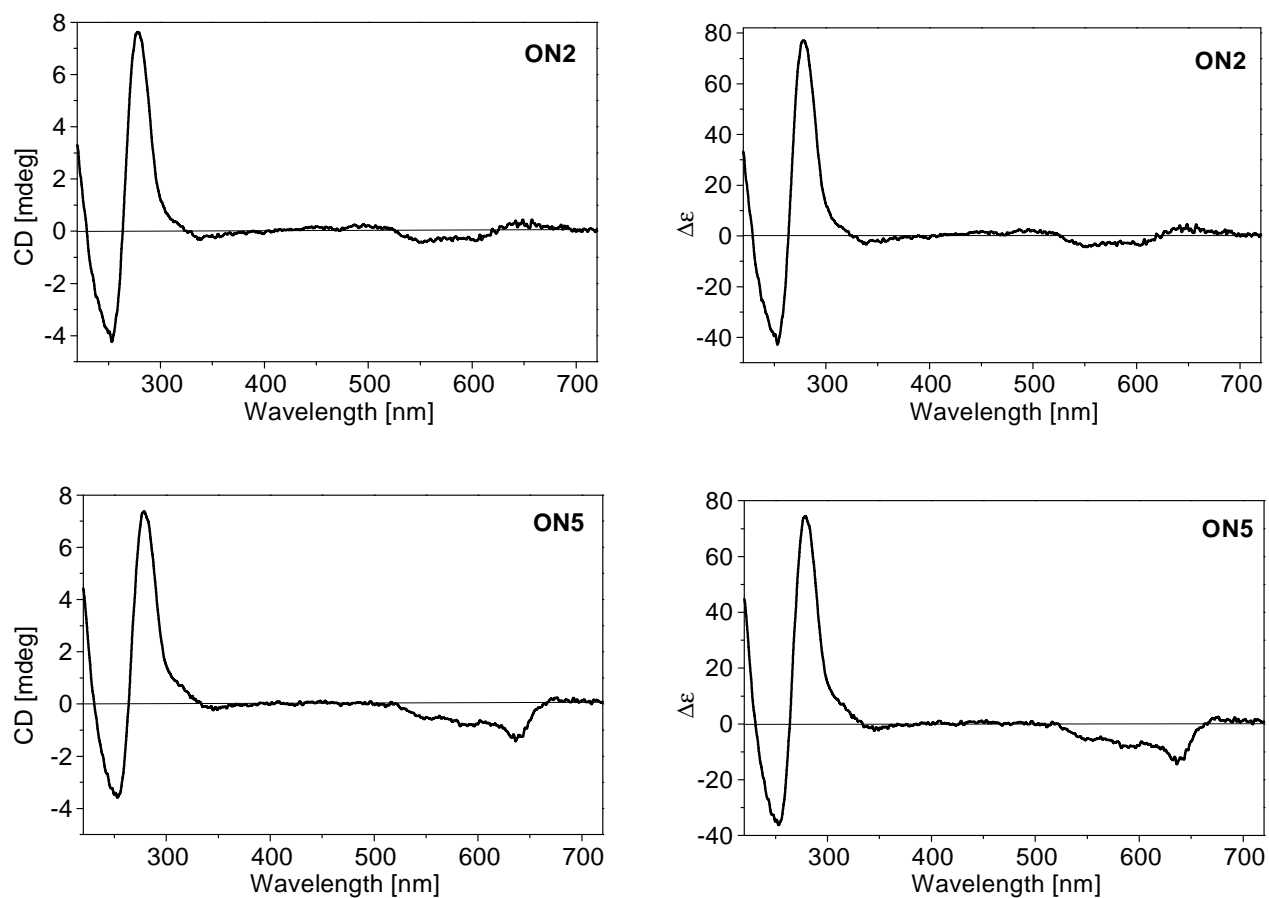

**Figure S10.** The CD spectra of the oligonucleotides **ON2** and **ON5** (conditions: 1.5  $\mu$ M single strand conc., 10 mM phosphate, pH = 7.4, 100 mM NaCl).

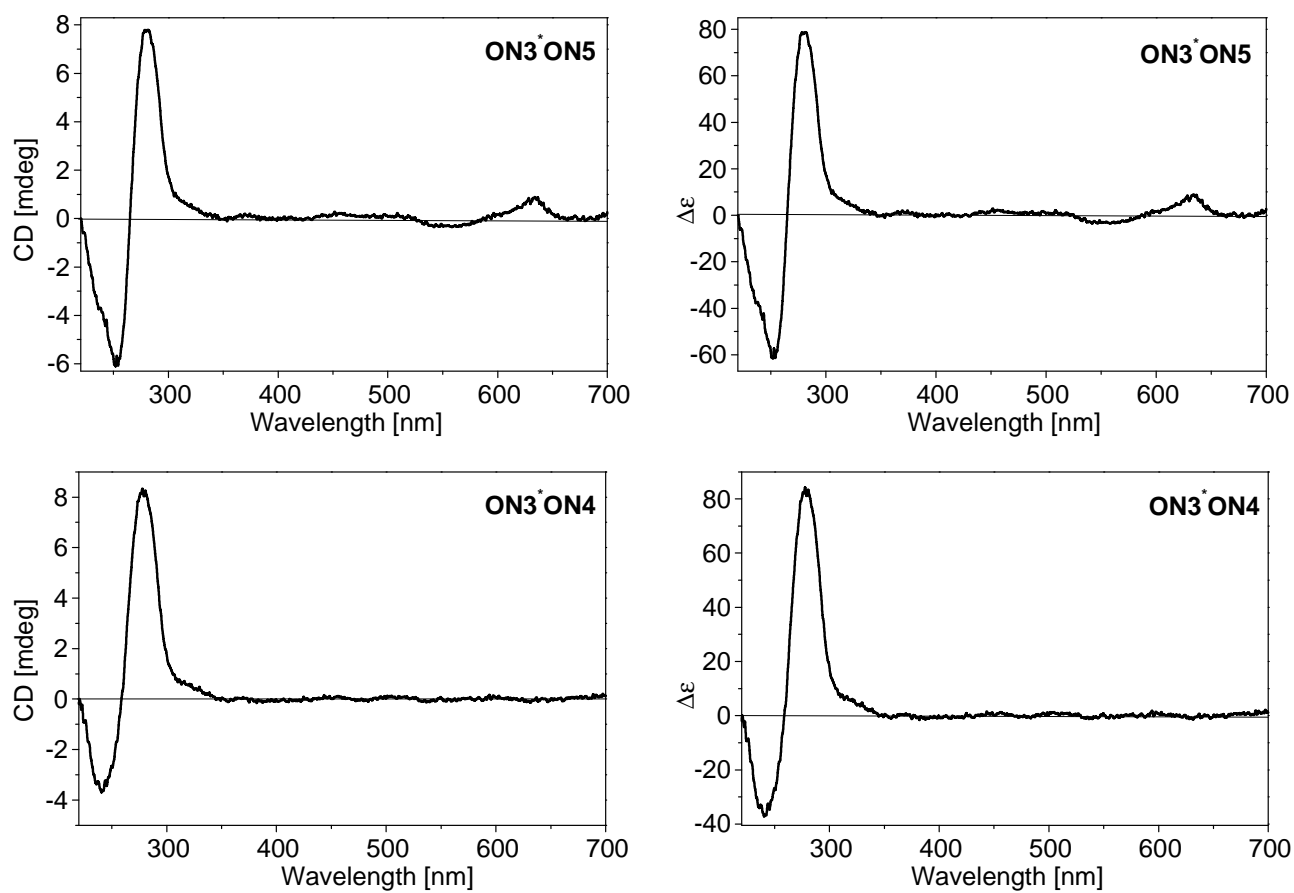

**Figure S11.** The CD spectra of the hybrids **ON3\*ON5** and **ON3\*ON4** (conditions: 1.5  $\mu$ M each strand conc., 10 mM phosphate, pH = 7.4, 100 mM NaCl).
